# Supplementary material for: Effects of the discontinuation of antihypertensive treatment on neuropsychiatric symptoms and quality of life in nursing home residents with dementia (DANTON): a multicentre, open-label, blinded-outcome, randomised controlled trial
Source: PubMed Central journal article supplement (PMC11227112; doi:10.1093/ageing/afae133), 2024-07-06
Supplement: aa-24-0274-file005_afae133(1).pdf [file aa-24-0274-file005_afae133%281%29.pdf]

## 1. INTRODUCTION

*Name (and sponsor's ID) of trial plus Netherlands Trial Register (NTR) number*

Trial name: Danton (Discontinuation of ANtihypertensive Treatment in Older people with dementia living in a Nursing home)

Number Netherlands Trial Register: will follow

Protocol name: 'Effects of stopping antihypertensive treatment on neuropsychiatric symptoms in nursing home residents with dementia'

Sponsor: Leiden University Medical Centre (CME ID: NL65719.058.18/ZonMW (Program Memorabel, dossier number 70-73305-98-1324)

*Objectives of trial, including interventions being investigated*

The primary objective of this study is to assess whether discontinuation of antihypertensive treatment in nursing home residents with dementia

- a) reduces NPS and improves quality of life;
- b) improves general daily functioning and cognitive functioning;
- c) reduces psychotropic medication use, falls, care dependency and caregiver burden;
- d) is safe regarding cardiovascular events.

*Outline of scope of charter*

This charter describes the roles and responsibilities of the Data Safety Monitoring Board of the Danton study.

## 2. ROLES AND RESPONSIBILITY

*A broad statement of the aims of the committee*

The aim of this DSMB is to ensure safety of participants of the Danton study.

*Specific roles of DSMB*

To regularly monitor the safety aspects of the Danton study

## 3. BEFORE AND EARLY IN THE TRIAL

*Whether the DSMB will have input into the protocol*

No.

*Whether the DSMB will meet before the start of the trial*

No.

*Any issues specific to the disease under study*

None.

*Any specific regulatory issues*

The Medical Ethical Committee of the LUMC has defined this trial as a non-medication trial.

*Whether members of the DSMB will have a contract*

No.

#### **4. COMPOSITION**

*Membership and size of DSMB*

The members of the DSMB are (alphabetical order):

Dr N. van Geloven, statistician, Leiden University Medical Centre, Leiden, the Netherlands

Prof.dr. W.A. van Gool, neurologist, Academic Medical Centre, Amsterdam, the Netherlands

Prof.dr. J.W. Jukema, cardiologist, Leiden University Medical Centre, Leiden, the Netherlands

*The Chair, how they are chosen and the Chair's role. (likewise, if relevant, the vice-Chairman)*

Prof.dr. J.W. Jukema, Leiden University Medical Centre, Leiden, the Netherlands

*Responsibility of the DSMB members*

The DSMB members ensure that this DSMB-charter is correct and will check the safety reports.

*Responsibility of the Principal Investigator(s)*

The Principal Investigators (Prof.dr. J Gussekloo, Dr RKE Poortvliet and Prof.dr W.P. Achterberg) ensure that the trial is executed according to the protocol.

*Responsibility of the Principal Investigator(s)*

The studyteam will be responsible for the organization of the DSMB meetings and the preparation of the materials.

#### **5. RELATIONSHIPS**

*Relationships with Principal Investigators, other trial committees (eg Trial Steering Committee (TSC) or Executive Committee), sponsor and regulatory bodies.*

The DSMB is independent of the Principal Investigators, sponsor, and regulatory bodies.

*Clarification of whether the DSMB is advisory (make recommendations) or executive (make decisions)*

The DSMB is advisory to the Principal Investigators.

*Payment to DSMB members*

None.

*The need for DSMB members to disclose information about any competing interests*

None.

## 6. ORGANIZATION OF DSMB MEETINGS

### *Expected frequency of DSMB meetings*

A DSMB meeting will be organized after the completion of the 4-months measurement of the first 50 participants, and thereafter after every 100 participants completed 4 months. The last meeting will be after the last participants completed the 4 months meeting.

### *Whether meetings will be face-to-face or by teleconference*

After a first face to face meeting of the DSMB, the further DSMB meetings will be by teleconference.

### *How DSMB meetings will be organized, especially regarding open and closed sessions, including who will be present in each session*

The DSMB meetings will have an open part (members + principal investigators) and a closed part (only members of the DSMB).

## 7. TRIAL DOCUMENTATION AND PROCEDURES TO ENSURE CONFIDENTIALITY AND PROPER COMMUNICATION

### *Intended content of material to be available*

The Principal Investigators will provide the DSMB with an unblinded report of

- 1) bloodpressure outcomes at baseline and 4 months
- 2) the following events during the trial: death, stroke, TIA, myocardial infarction, and hospital admission. All participating elderly care physicians are required to provide this SAE-information about trial participants to the trial personnel within seven days after the event. The trial personnel will record the information in the study database.

### *Will the DSMB be blinded to the treatment allocation*

No.

### *Who will see the accumulating data and interim analysis*

All members of the DSMB will see the accumulating data

### *To whom the DSMB will communicate the recommendations that are reached*

The DSMB communicates its recommendations to the Principal Investigators.

### *Whether reports to the DSMB be available before the meeting or only at/during the meeting*

Reports will be available before and during the meetings

## 8. DECISION MAKING

### *What decisions/recommendations will be open to the DSMB*

The DSMB can make any recommendation with regard to changing or stopping the trial.

### *The role of formal statistical methods, specially which methods will be used and whether they*

*will be used as guidelines or rules*

Blood pressure (Baseline and follow-up) and type of event (death, myocardial infarction, stroke, transient ischemic attack, or any non-elective hospitalization) will be given according to treatment allocation. Possible differences between treatment groups will be evaluated statistically using standard statistical techniques. Results will be used as guideline for reaching a recommendation.

*How decisions or recommendations will be reached within the DSMB*

The DSMB will reach their recommendations by consensus. If no consensus can be reached, they will vote, where each member has an equally weighted vote.

*What is the quorum for the DSMB for decision-making*

The quorum for the DSMB for decision making is two, i.e. at least two members must be present to reach a valid decision.

*Can DSMB members who cannot attend the meeting input*

Yes.

*Whether different weight will be given to differentiate endpoints (eg safety/efficacy)*

There will be no interim analysis on the endpoint(s) of the trial. Only the stated safety outcomes will be evaluated.

## **9. DECISION MAKING**

*To whom will the DSMB report their recommendations/decisions, and in what form*

After each meeting the DSMB will report their recommendation to the Principal Investigators of the trial.

*Whether minutes of the meeting be made and, if so, by whom and where they will be kept*

Yes, the chairman will make and keep the minutes of each meeting.

*What will be done if there is disagreement between the DSMB and the body to which it reports*

The Principal Investigators will decide whether it follows the recommendation of the DSMB or not.

## **10. AFTER THE TRIAL**

*Publication of results*

The results of the DSMB-meetings will not be published.

*The information about the DSMB that will be included in published trial reports*

Information about the recommendations of the DSMB may be included in the published reports.

*Whether the DSMB will have the opportunity to approve publications, especially with respect to*

*reporting of any DSMB recommendation regarding termination of trial*  
No.

*Any constraints on DSMB members divulging information about their deliberations after the trial has been published*  
No.
